# Supplementary material
Source: publisher site journal article supplement (https://www.dovepress.com/article/263658)
Supplement: Supplementary file 1 [file get_supplementary_file.php]

**Supplementary Materials.**

**Supplementary Table 1.** Questionnaire assessing satisfaction levels with System U Preloaded Delivery System on a scale of 1 to 7.

|  | **1=Not Satisfied at All  7=Extremely Satisfied** |
| --- | --- |
| Device is intuitive to use |  |
| Device is easy to prepare |  |
| Smooth continuous IOL advancement during delivery |  |
| Ability to control deployment of IOL |  |
| Number of steps to prepare device for service |  |
| Workflow between ophthalmologists and nurse/tech |  |
| Overall time it takes to deliver the IOL |  |
| Overall control in the procedure |  |
| Your overall confidence in using the device |  |
| Other aspect not mentioned (please specify) |  |

**Supplementary Table 2.** Questionnaire assessing satisfaction levels with System U compared with the most often used manually loaded devices on a scale of 1 to 9.

|  | **1=Manual Device Better*  5=Neutral; 9=System U Better** |
| --- | --- |
| Device is intuitive to use |  |
| Device is easy to prepare |  |
| Smooth continuous IOL advancement during delivery |  |
| Ability to control deployment of IOL |  |
| Number of steps to prepare device for service |  |
| Workflow between ophthalmologists and nurse/tech |  |
| Overall time it takes to deliver the IOL |  |
| Overall control in the procedure |  |
| Your overall confidence in using the device |  |
| Other aspect not mentioned (please specify) |  |

*The most often used manually loaded devices were the Monarch III (Alcon), Unfolder (AMO), BLIS (Bausch + Lomb), and AT Shooter (Zeiss).

**Supplementary Table 3.** Questionnaire assessing satisfaction levels with System U compared with the most often used preloaded devices on a scale of 1 to 9.

|  | **1=Other Preloaded Device Better* 5=Neutral; 9=System U Better** |
| --- | --- |
| Device is intuitive to use |  |
| Device is easy to prepare |  |
| Smooth continuous IOL advancement during delivery |  |
| Ability to control deployment of IOL |  |
| Number of steps to prepare device for service |  |
| Workflow between ophthalmologists and nurse/tech |  |
| Overall time it takes to deliver the IOL |  |
| Overall control in the procedure |  |
| Your overall confidence in using the device |  |
| Other aspect not mentioned (please specify) |  |

*The most often used preloaded devices were the iTec (AMO), BLUEMIXS (Zeiss), ACCUJECT (Zeiss), iSert 250/251 (Hoya), and Vivinex iSert (Hoya)
